# Supplementary material
Source: PubMed Central journal article supplement (PMC6459106)
Supplement: jamadermatol-155-425-s001.pdf [file jamadermatol-155-425-s001.pdf]

## Supplementary Online Content

Chien AL, Tsai J, Leung S, et al. Association of systemic antibiotic treatment of acne with skin microbiota characteristics. *JAMA Dermatol*. Published online February 13, 2019. doi:10.1001/jamadermatol.2018.5221

**eTable.** Read Count and Operational Taxonomic Unit (OTU) Assignment of Individual Skin Samples

**eFigure 1.** Microbial Distributions of All Samples at the Phylum and Genus Levels

**eFigure 2.** Dynamics of Bacterial Populations in the Presence and After Withdrawal of Antibiotic Treatment Stratified by Individual Patients

**eReference**

This supplementary material has been provided by the authors to give readers additional information about their work.

**eTable.** Read Count and Operational Taxonomic Unit (OTU) Assignment of Individual Skin Samples

| Sample ID            | Raw Reads | Reads Assigned to OTU | Unmapped Reads | % Unmapped Reads |
|----------------------|-----------|-----------------------|----------------|------------------|
| 03.AF.BL.L.cheek     | 96262     | 96215                 | 47             | 0.05%            |
| 03.AF.BL.L.chin      | 77076     | 76982                 | 94             | 0.12%            |
| 03.AF.BL.L.forehead  | 81311     | 81247                 | 64             | 0.08%            |
| 03.AF.BL.R.cheek     | 72485     | 72412                 | 73             | 0.10%            |
| 03.AF.BL.R.chin      | 75895     | 75750                 | 145            | 0.19%            |
| 03.AF.BL.R.forehead  | 82590     | 82525                 | 65             | 0.08%            |
| 03.AF.w12.L.cheek    | 75123     | 74892                 | 231            | 0.31%            |
| 03.AF.w12.L.chin     | 76110     | 75960                 | 150            | 0.20%            |
| 03.AF.w12.L.forehead | 67789     | 67714                 | 75             | 0.11%            |
| 03.AF.w12.R.cheek    | 78222     | 78021                 | 201            | 0.26%            |
| 03.AF.w12.R.chin     | 86335     | 86233                 | 102            | 0.12%            |
| 03.AF.w12.R.forehead | 85326     | 85204                 | 122            | 0.14%            |
| 03.AF.w4.L.cheek     | 70700     | 70607                 | 93             | 0.13%            |
| 03.AF.w4.L.chin      | 81268     | 81144                 | 124            | 0.15%            |
| 03.AF.w4.L.forehead  | 74708     | 74664                 | 44             | 0.06%            |
| 03.AF.w4.R.cheek     | 83218     | 83090                 | 128            | 0.15%            |
| 03.AF.w4.R.chin      | 121917    | 121790                | 127            | 0.10%            |
| 03.AF.w4.R.forehead  | 65309     | 65215                 | 94             | 0.14%            |
| 03.AF.w5.L.cheek     | 111727    | 111629                | 98             | 0.09%            |
| 03.AF.w5.L.chin      | 95336     | 95253                 | 83             | 0.09%            |
| 03.AF.w5.L.forehead  | 78137     | 78063                 | 74             | 0.09%            |
| 03.AF.w5.R.cheek     | 83286     | 83204                 | 82             | 0.10%            |
| 03.AF.w5.R.chin      | 68880     | 68819                 | 61             | 0.09%            |
| 03.AF.w5.R.forehead  | 103422    | 103360                | 62             | 0.06%            |
| 04.AT.BL.L.chin      | 75129     | 74947                 | 182            | 0.24%            |
| 04.AT.BL.L.forehead  | 84897     | 84661                 | 236            | 0.28%            |
| 04.AT.BL.R.cheek     | 88073     | 87880                 | 193            | 0.22%            |
| 04.AT.BL.R.chin      | 101387    | 101000                | 387            | 0.38%            |
| 04.AT.w12.L.cheek    | 85481     | 84985                 | 496            | 0.58%            |
| 04.AT.w12.L.chin     | 66396     | 65843                 | 553            | 0.83%            |
| 04.AT.w12.L.forehead | 62489     | 62394                 | 95             | 0.15%            |
| 04.AT.w12.R.cheek    | 77672     | 77310                 | 362            | 0.47%            |
| 04.AT.w12.R.chin     | 63289     | 62471                 | 818            | 1.29%            |
| 04.AT.w12.R.forehead | 1735      | 0                     | 1735           | 100%             |
| 04.AT.w4.L.cheek     | 91845     | 91709                 | 136            | 0.15%            |
| 04.AT.w4.L.chin      | 63061     | 62900                 | 161            | 0.26%            |
| 04.AT.w4.L.forehead  | 99058     | 98758                 | 300            | 0.30%            |
| 04.AT.w4.R.cheek     | 90675     | 90507                 | 168            | 0.19%            |
| 04.AT.w4.R.chin      | 65206     | 64932                 | 274            | 0.42%            |
| 04.AT.w4.R.forehead  | 71199     | 70964                 | 235            | 0.33%            |
| 04.AT.w5.L.cheek     | 68223     | 67924                 | 299            | 0.44%            |
| 04.AT.w5.L.chin      | 85188     | 85034                 | 154            | 0.18%            |

|                      |        |        |      |       |
|----------------------|--------|--------|------|-------|
| 04.AT.w5.L.forehead  | 73545  | 73325  | 220  | 0.30% |
| 04.AT.w5.R.cheek     | 102016 | 101928 | 88   | 0.09% |
| 04.AT.w5.R.chin      | 81101  | 80929  | 172  | 0.21% |
| 04.AT.w5.R.forehead  | 60613  | 60299  | 314  | 0.52% |
| 05.CB.BL.L.cheek     | 78901  | 77744  | 1157 | 1.47% |
| 05.CB.BL.L.chin      | 108591 | 107572 | 1019 | 0.94% |
| 05.CB.BL.L.forehead  | 70669  | 69974  | 695  | 0.98% |
| 05.CB.BL.R.cheek     | 78023  | 77134  | 889  | 1.14% |
| 05.CB.BL.R.chin      | 77728  | 76899  | 829  | 1.07% |
| 05.CB.BL.R.forehead  | 70992  | 69802  | 1190 | 1.68% |
| 05.CB.w12.L.cheek    | 63146  | 63094  | 52   | 0.08% |
| 05.CB.w12.L.chin     | 52152  | 52093  | 59   | 0.11% |
| 05.CB.w12.L.forehead | 49456  | 49418  | 38   | 0.08% |
| 05.CB.w12.R.cheek    | 9822   | 9771   | 51   | 0.52% |
| 05.CB.w12.R.chin     | 29464  | 29428  | 36   | 0.12% |
| 05.CB.w12.R.forehead | 56029  | 55990  | 39   | 0.07% |
| 05.CB.w4.L.cheek     | 81875  | 80779  | 1096 | 1.34% |
| 05.CB.w4.L.chin      | 56037  | 55997  | 40   | 0.07% |
| 05.CB.w4.L.forehead  | 55446  | 54923  | 523  | 0.94% |
| 05.CB.w4.R.cheek     | 63921  | 63064  | 857  | 1.34% |
| 05.CB.w4.R.chin      | 64598  | 64553  | 45   | 0.07% |
| 05.CB.w4.R.forehead  | 90283  | 89437  | 846  | 0.94% |
| 05.CB.w5.L.cheek     | 58948  | 58867  | 81   | 0.14% |
| 05.CB.w5.L.chin      | 57515  | 57473  | 42   | 0.07% |
| 05.CB.w5.L.forehead  | 56128  | 56046  | 82   | 0.15% |
| 05.CB.w5.R.cheek     | 51543  | 51476  | 67   | 0.13% |
| 05.CB.w5.R.chin      | 66759  | 66691  | 68   | 0.10% |
| 05.CB.w5.R.forehead  | 52145  | 52100  | 45   | 0.09% |
| 07.AS.BL.L.cheek     | 9375   | 9351   | 24   | 0.26% |
| 07.AS.BL.L.chin      | 23970  | 23945  | 25   | 0.10% |
| 07.AS.BL.L.forehead  | 42353  | 42288  | 65   | 0.15% |
| 07.AS.BL.R.cheek     | 41296  | 41261  | 35   | 0.08% |
| 07.AS.BL.R.chin      | 47098  | 47053  | 45   | 0.10% |
| 07.AS.BL.R.forehead  | 38525  | 38450  | 75   | 0.19% |
| 07.AS.w4.L.cheek     | 34490  | 34444  | 46   | 0.13% |
| 07.AS.w4.L.chin      | 39924  | 39898  | 26   | 0.07% |
| 07.AS.w4.L.forehead  | 18658  | 18641  | 17   | 0.09% |
| 07.AS.w4.R.cheek     | 21     | 0      | 21   | 100%  |
| 07.AS.w4.R.chin      | 34254  | 34229  | 25   | 0.07% |
| 07.AS.w4.R.forehead  | 18599  | 18582  | 17   | 0.09% |
| 07.AS.w5.L.cheek     | 8755   | 8746   | 9    | 0.10% |
| 07.AS.w5.L.chin      | 211    | 0      | 211  | 100%  |
| 07.AS.w5.L.forehead  | 44126  | 44078  | 48   | 0.11% |
| 07.AS.w5.R.cheek     | 20910  | 20885  | 25   | 0.12% |
| 07.AS.w5.R.chin      | 23     | 0      | 23   | 100%  |
| 07.AS.w5.R.forehead  | 25899  | 25878  | 21   | 0.08% |

**eFigure 1. Microbial Distributions of All Samples at the Phylum and Genus Levels**

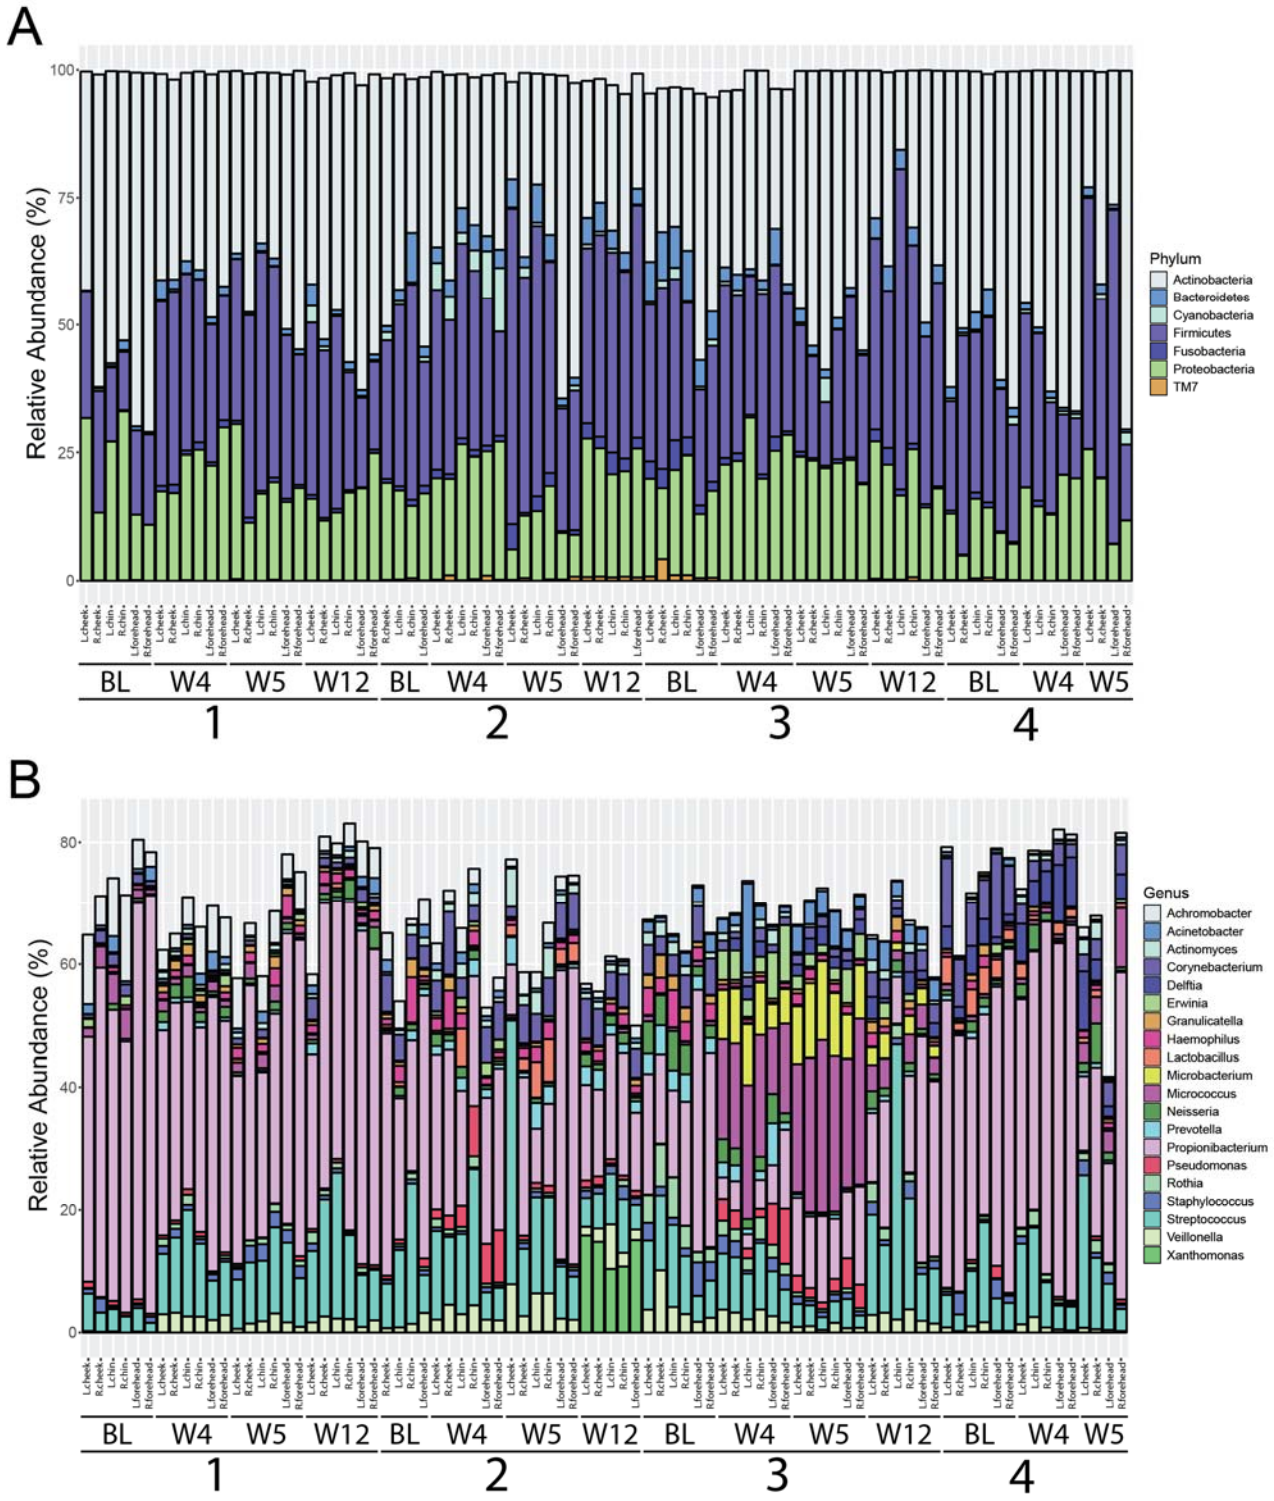

**eFigure 1.** Taxonomy bar plots comparing microbial distributions of skin samples from all 4 patients at the **A.** Phylum level showing all phyla with relative abundance greater than 0.1% across all samples and **B.** Genus level showing top 30 genera across all samples. BL indicates baseline; W4, week 4; W5, week 5; W12, week 12. Taxonomy bar plots created with phyloseq<sup>1</sup> package in R.

**eFigure 2.** Dynamics of Bacterial Populations in the Presence and After Withdrawal of Antibiotic Treatment Stratified by Individual Patients

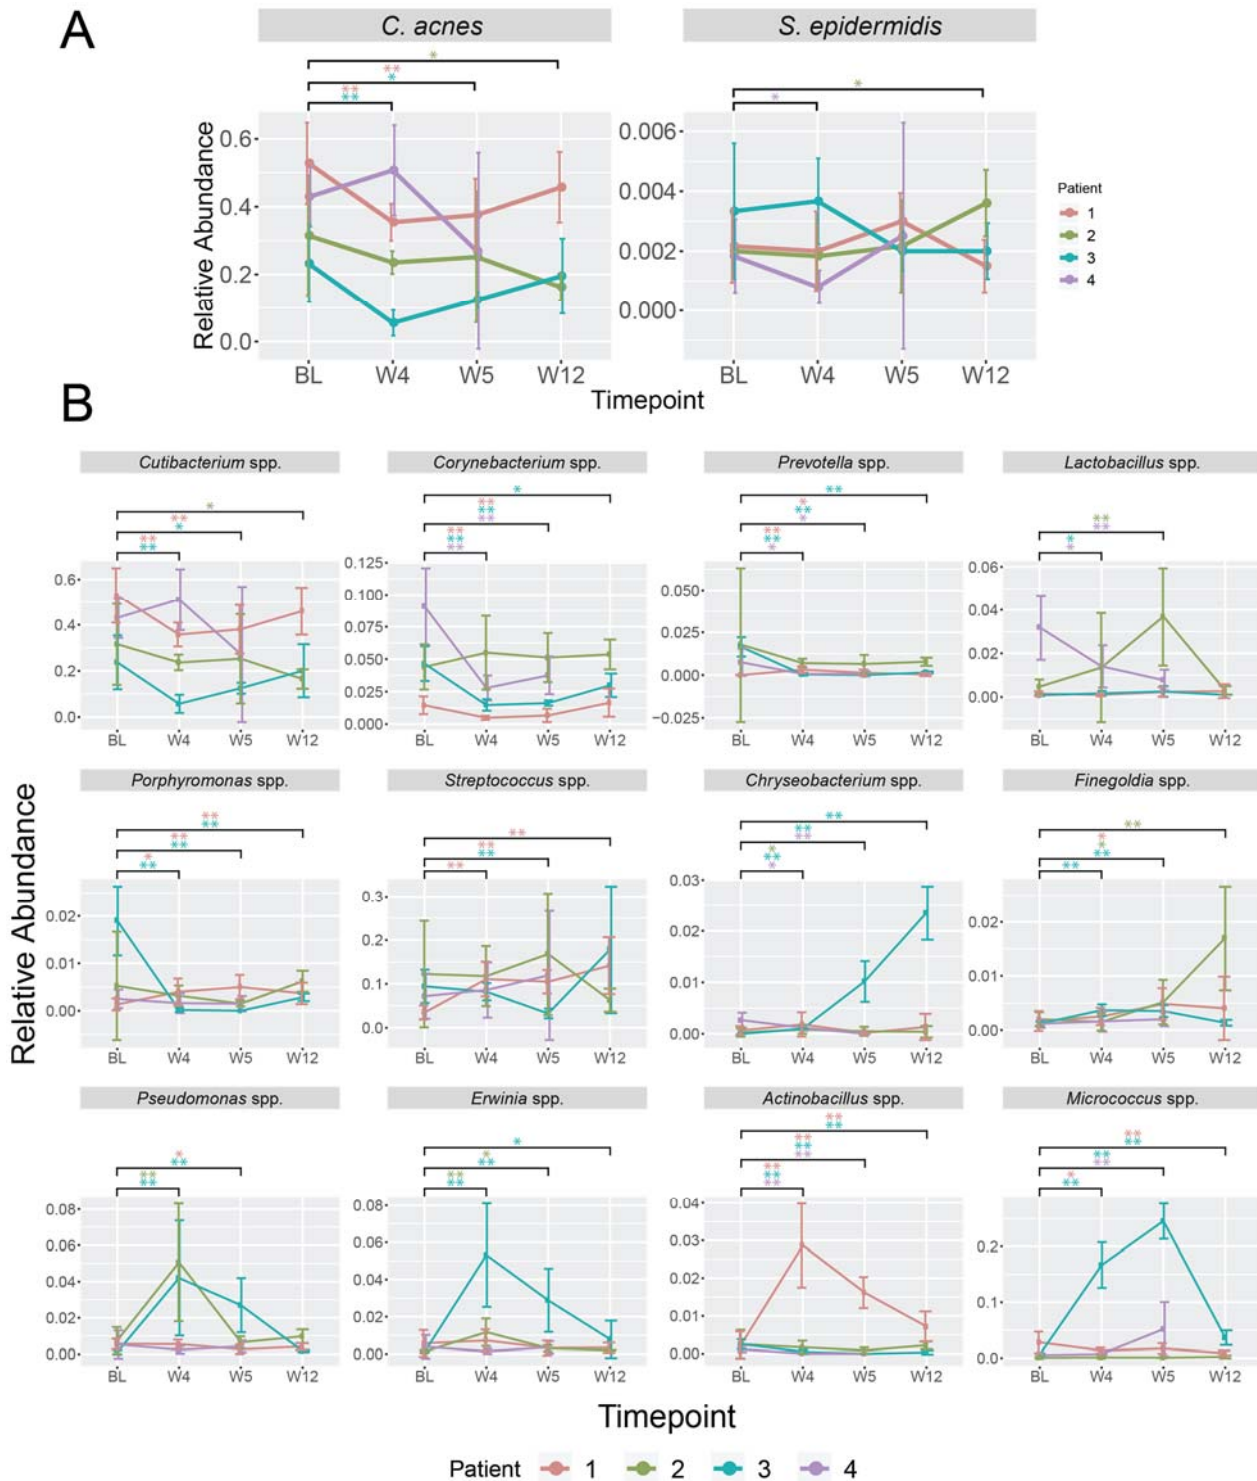

**eFigure 2. A.** Relative abundance of *Cutibacterium acnes* and *Staphylococcus epidermidis* at various times during and after antibiotic treatment in individual patients. **B.** Relative abundance of selected bacterial genera at various times during and after antibiotic treatment in individual patients. Error bars indicate 95% CIs. *P* values calculated using *t* tests with 1000 Monte Carlo permutations and 5% false-discovery rate adjustment. \**P* < .05, \*\**P* < .01. BL indicates baseline; W4, week 4; W5, week 5; W12; week 12.

## eReference

1. McMurdie PJ, Holmes S. phyloseq: an R package for reproducible interactive analysis and graphics of microbiome census data. *PLoS One*. 2013;8(4):e61217.
